# Supplementary material
Source: publisher figshare collection journal article supplement (https://frontiersin.figshare.com/ndownloader/files/13356257)
Supplement: Supplementary file 1 [file 13356257]

## Sheet: Proteins
Supplementary Table S2. Protein identifications in T. pseudonana CCMP1335 exoproteomes. The distribution of proteins among biological replicates is indicated in the last three columns.
Checked	Protein FDR Confidence: Combined	Master	GenBank	GenInfo	Description	Exp. q-value: Combined	Sum PEP Score	Coverage [%]	# Peptides	# PSMs	# Unique Peptides	# Protein Groups	# AAs	MW [kDa]	calc. pI	Score Mascot: A2 Mascot	Score Mascot: B2 Mascot	Score Mascot: C2 Mascot	# Peptides (by Search Engine): A2 Mascot	# Peptides (by Search Engine): B2 Mascot	# Peptides (by Search Engine): C2 Mascot	Biological Process	Cellular Component	Molecular Function	P hydrolase	Pfam IDs	Entrez Gene ID	Ensembl Gene ID	Gene Symbol	Chromosome	KEGG Pathways	WikiPathways	Found in Sample: [S4] F4: Sample	Found in Sample: [S5] F5: Sample	Found in Sample: [S6] F6: Sample
FALSE	High	Master Protein	EED96396.1	220978070	predicted protein [Thalassiosira pseudonana CCMP1335]	0	166.465	35	16	161	16	1	578	63	4.56	1464	1695	1811	13	16	15					Pf00188	7451440	THAPSDRAFT_20786	THAPSDRAFT_20786	1			High	High	High
FALSE	High	Master Protein	ACI64141.1	209583455	predicted protein, partial [Thalassiosira pseudonana CCMP1335]	0	157.214	22	12	67	12	1	862	94	4.18	676	528	636	12	11	12					Pf00187	7444773	THAPS_12594	THAPS_12594	18			High	High	High
FALSE	High	Master Protein	ACI64154.1	209583468	predicted protein [Thalassiosira pseudonana CCMP1335]	0	133.938	24	17	104	17	1	918	99.5	4.28	855	812	714	14	16	15					Pf00187	7442998	THAPS_26041	THAPS_26041	18			High	High	High
FALSE	High	Master Protein	EED90936.1	220972604	predicted protein [Thalassiosira pseudonana CCMP1335]	0	133.113	49	15	133	3	1	326	35.2	5.06	1324	1199	1762	14	15	15			protein binding		Pf00050, Pf07648	7452854	THAPSDRAFT_23813	THAPSDRAFT_23813	8			High	High	High
FALSE	High	Master Protein	EED90704.1	220972372	probable serine protease inhibitor [Thalassiosira pseudonana CCMP1335]	0	124.949	41	14	124	2	1	486	52.1	4.81	1148	1224	1753	13	14	14			protein binding		Pf00050, Pf07648	7452855	THAPSDRAFT_23814	THAPSDRAFT_23814	8			High	High	High
FALSE	High	Master Protein	EED91015.1	220972684	predicted protein [Thalassiosira pseudonana CCMP1335]	0	121.693	8	26	48	26	1	4007	440.9	4.75	419	319	232	19	19	9	metabolic process		catalytic activity		Pf02018, Pf07394, Pf08811, Pf13229	7448357	THAPSDRAFT_22950	THAPSDRAFT_22950	6			High	High	High
FALSE	High	Master Protein	EED89589.1	220971254	predicted protein [Thalassiosira pseudonana CCMP1335]	0	116.241	11	22	44	22	1	2657	292.3	4.92	481	407	379	16	13	15					Pf00173, Pf03422, Pf04886, Pf07394, Pf08811	7443233	THAPSDRAFT_24417	THAPSDRAFT_24417	12			High	High	High
FALSE	High	Master Protein	ACI64493.1	209585808	predicted protein [Thalassiosira pseudonana CCMP1335]	0	112.031	20	10	108	10	1	653	72.1	5.99	1563	1628	1301	10	9	9					Pf00188	7449006	THAPS_23416	THAPS_23416	7			High	High	High
FALSE	High	Master Protein	EED86229.1	220967856	predicted protein [Thalassiosira pseudonana CCMP1335]	0	91.451	29	12	90	11	1	570	59.5	4.42	436	577	601	10	12	11	metabolic process	extracellular	catalytic activity			7446068	THAPSDRAFT_bd1882	THAPSDRAFT_bd1882				High	High	High
FALSE	High	Master Protein	EED92589.1	220974259	predicted protein [Thalassiosira pseudonana CCMP1335]	0	83.983	4	10	36	10	1	3340	369.8	5.72	410	285	306	9	9	8			catalytic activity;DNA binding		Pf02204, Pf02732, Pf04935, Pf09826, Pf15459	7444864	THAPSDRAFT_22869	THAPSDRAFT_22869	5	Nucleotide excision repair		High	High	High
FALSE	High	Master Protein	EED90158.1	220971825	predicted protein [Thalassiosira pseudonana CCMP1335]	0	82.543	46	10	52	10	1	293	31.2	4.92	327	364	602	9	8	10						7449269	THAPSDRAFT_23918	THAPSDRAFT_23918	9			High	High	High
FALSE	High	Master Protein	EED86158.1	220967782	ribulose-bisphosphate carboxylase, large subunit or chain, chloroplast, RuBisCo [Thalassiosira pseudonana CCMP1335]	0	82.397	18	8	62	8	1	490	54.3	6.55	705	650	687	8	8	8	metabolic process		catalytic activity;metal ion binding		Pf00016, Pf02788	7447414	THAPSDRAFT_bd2088	RBL		Carbon metabolism; Carbon fixation in photosynthetic organisms; Metabolic pathways; Glyoxylate and dicarboxylate metabolism		High	High	High
FALSE	High	Master Protein	EED86224.1	220967851	predicted protein [Thalassiosira pseudonana CCMP1335]	0	78.887	5	9	25	9	1	2612	280.7	4.86	308	242	284	6	7	6			catalytic activity		Pf05548	7446063	THAPSDRAFT_bd1879	THAPSDRAFT_bd1879				High	High	High
FALSE	High	Master Protein	EED89571.1	220971236	predicted protein [Thalassiosira pseudonana CCMP1335]	0	78.145	9	12	45	8	1	1713	182.1	5.31	476	435	395	11	8	7						7448043	THAPSDRAFT_9277	THAPSDRAFT_9277	12			High	High	High
FALSE	High	Master Protein	EED89569.1	220971234	copper induced cell-surface protein [Thalassiosira pseudonana CCMP1335]	0	73.991	21	8	35	8	1	602	63.2	4.2	465	493	496	8	8	8						7443213	THAPSDRAFT_24571	THAPSDRAFT_24571	12			High	High	High
FALSE	High	Master Protein	EED86354.1	220967993	predicted protein [Thalassiosira pseudonana CCMP1335]	0	69.477	16	9	26	9	1	737	81.1	4.64	180	322	294	7	8	7	metabolic process		catalytic activity;nucleotide binding		Pf01565	7447359	THAPSDRAFT_bd1810	THAPSDRAFT_bd1810				High	High	High
FALSE	High	Master Protein	EED88796.1	220970459	phosphoadenosine-phosphosulphate reductase [Thalassiosira pseudonana CCMP1335]	0	68.56	34	13	30	13	1	438	49	5.1	128	274	347	7	9	11	cellular homeostasis;metabolic process;regulation of biological process		catalytic activity		Pf00085, Pf01507	7441796	THAPSDRAFT_24887	THAPSDRAFT_24887	14			High	High	High
FALSE	High	Master Protein	EED88733.1	220970396	predicted protein [Thalassiosira pseudonana CCMP1335]	0	67.766	10	12	43	12	1	1481	160.7	4.35	246	288	268	8	9	9						7451219	THAPSDRAFT_24818	THAPSDRAFT_24818	14			High	High	High
FALSE	High	Master Protein	EED91276.1	220972945	translation factor tu domain 2 [Thalassiosira pseudonana CCMP1335]	0	66.113	17	12	31	12	1	835	91.8	6.33	251	222	220	10	9	7			catalytic activity;nucleotide binding	P hydrolase of P-containing anhydrides	Pf00009, Pf00679, Pf01926, Pf03144, Pf03764, Pf14492	7442740	THAPSDRAFT_269148	THAPSDRAFT_269148	6			High	High	High
FALSE	High	Master Protein	EED89173.1	220970837	predicted protein [Thalassiosira pseudonana CCMP1335]	0	63.114	24	8	39	4	1	390	43.3	4.53	281	287	266	6	8	5						7447869	THAPSDRAFT_24711	THAPSDRAFT_24711	13			High	High	High
FALSE	High	Master Protein	EED87250.1	220968906	predicted protein [Thalassiosira pseudonana CCMP1335]	0	57.782	5	7	24	7	1	1846	197.3	4.01	155	181	137	6	7	5					Pf05738, Pf13620	7448303	THAPSDRAFT_24325	THAPSDRAFT_24325	11			High	High	High
FALSE	High	Master Protein	EED93540.1	220975211	predicted protein [Thalassiosira pseudonana CCMP1335]	0	55.842	18	6	31	6	1	400	42.7	5.01	185	312	305	5	6	6	metabolic process		catalytic activity;metal ion binding		Pf01116	7451396	THAPSDRAFT_270396	THAPSDRAFT_270396	4			High	High	High
FALSE	High	Master Protein	EED90178.1	220971845	predicted protein [Thalassiosira pseudonana CCMP1335]	0	52.228	6	8	16	8	1	1589	169.3	4.36	232	178	137	6	5	4						7449281	THAPSDRAFT_23933	THAPSDRAFT_23933	9			High	High	High
FALSE	High	Master Protein	EED86339.1	220967976	predicted protein [Thalassiosira pseudonana CCMP1335]	0	50.882	38	6	17	6	1	241	26.5	4.89	143	340	185	5	6	4					Pf00188	7447675	THAPSDRAFT_bd1823	THAPSDRAFT_bd1823				High	High	High
FALSE	High	Master Protein	YP_874497.1	118411103	ribulose-1,5-bisphosphate carboxylase/oxygenase small subunit (chloroplast) [Thalassiosira pseudonana]	0	49.431	53	6	17	6	1	139	15.8	5.07	287	171	215	4	4	4					Pf00101	4524792		rbcS				High	High	High
FALSE	High	Master Protein	ACI64590.1	209585905	predicted protein [Thalassiosira pseudonana CCMP1335]	0	47.475	15	6	23	6	1	551	58.6	4.12	187	189	329	5	5	6						7447082	THAPS_269258	THAPS_269258	7			High	High	High
FALSE	High	Master Protein	EED94121.1	220975793	14-3-3-like protein [Thalassiosira pseudonana CCMP1335]	0	46.681	33	8	36	8	1	247	27.9	4.72	314	236	250	5	6	8			protein binding		Pf00244	7441736	THAPSDRAFT_26146	THAPSDRAFT_26146	3			High	High	High
FALSE	High	Master Protein	EED86317.1	220967954	predicted protein [Thalassiosira pseudonana CCMP1335]	0	46.485	24	9	30	9	1	421	44.8	5.17	198	237	189	7	8	7					Pf00188	7447695	THAPSDRAFT_bd1821	THAPSDRAFT_bd1821				High	High	High
FALSE	High	Master Protein	EED86209.1	220967836	predicted protein [Thalassiosira pseudonana CCMP1335]	0	46.184	10	5	29	4	1	591	62.7	4.26	198	191	217	5	5	5	metabolic process	extracellular	catalytic activity			7446065	THAPSDRAFT_bd1880	THAPSDRAFT_bd1880				High	High	High
FALSE	High	Master Protein	ACI64758.1	209586073	F-type H-ATPase beta subunit [Thalassiosira pseudonana CCMP1335]	0	43.811	23	9	21	7	1	500	53.4	5.22	131	205	230	5	5	7	metabolic process;transport		catalytic activity;nucleotide binding;transporter activity	P hydrolase of P-containing anhydrides	Pf00006, Pf00306, Pf02874	7446618	THAPS_41256	THAPS_41256	7	Metabolic pathways; Oxidative phosphorylation		High	High	High
FALSE	High	Master Protein	EED94643.1	220976316	transketolase [Thalassiosira pseudonana CCMP1335]	0	43.078	15	10	22	10	1	663	71.7	5.11	136	231	202	5	8	8	metabolic process		catalytic activity		Pf00456, Pf02779, Pf02780	7448665	THAPSDRAFT_21175	TKT2	2	Metabolic pathways; Biosynthesis of amino acids; Carbon metabolism; Carbon fixation in photosynthetic organisms; Biosynthesis of secondary metabolites; Pentose phosphate pathway; Biosynthesis of antibiotics		High	High	High
FALSE	High	Master Protein	EED91249.1	220972918	predicted protein [Thalassiosira pseudonana CCMP1335]	0	43.042	13	4	21	4	1	512	56.7	4.27	172	200	184	4	4	2						7453273	THAPSDRAFT_23191	THAPSDRAFT_23191	6			High	High	High
FALSE	High	Master Protein	EED86199.1	220967825	predicted protein [Thalassiosira pseudonana CCMP1335]	0	42.177	17	7	17	7	1	583	64.6	6.38	218	129	110	5	5	4						7446318	THAPSDRAFT_bd1890	THAPSDRAFT_bd1890				High	High	High
FALSE	High	Master Protein	EED95307.1	220976980	predicted protein [Thalassiosira pseudonana CCMP1335]	0	41.907	27	7	23	7	1	365	37.9	5.45	132	182	177	5	5	6	metabolic process		catalytic activity		Pf00291	7444669	THAPSDRAFT_270338	THAPSDRAFT_270338	2	Cysteine and methionine metabolism; Biosynthesis of secondary metabolites; Metabolic pathways; Biosynthesis of antibiotics; Biosynthesis of amino acids; Carbon metabolism; Sulfur metabolism		High	High	High
FALSE	High	Master Protein	EED86425.1	220968069	predicted protein [Thalassiosira pseudonana CCMP1335]	0	41.645	11	3	9	3	1	430	47.4	4.61	123	112	54	3	2	2					Pf03713	7444450	THAPSDRAFT_bd1757	THAPSDRAFT_bd1757				High	High	High
FALSE	High	Master Protein	EED95757.1	220977431	probable malate dehydrogenase with mitochondrial or glyoxysomal precursor [Thalassiosira pseudonana CCMP1335]	0	39.288	19	4	10	4	1	352	36.7	6.37	49	77	229	1	3	4	metabolic process		catalytic activity		Pf00056, Pf02866	7445648	THAPSDRAFT_20726	MDH1	1	Citrate cycle (TCA cycle); Biosynthesis of antibiotics; Cysteine and methionine metabolism; Carbon metabolism; Metabolic pathways; Carbon fixation in photosynthetic organisms; Biosynthesis of secondary metabolites; Pyruvate metabolism; Glyoxylate and dicarboxylate metabolism		High	High	High
FALSE	High	Master Protein	EED90008.1	220971674	translation elongation factor alpha [Thalassiosira pseudonana CCMP1335]	0	37.729	18	7	18	7	1	453	49.9	8.31	92	152	56	6	5	4			catalytic activity;nucleotide binding	P hydrolase of P-containing anhydrides	Pf00009, Pf03143, Pf03144, Pf14578	7451081	THAPSDRAFT_41829	THAPSDRAFT_41829	10	RNA transport		High	High	High
FALSE	High	Master Protein	EED87387.1	220969044	ferredoxin-nadp reductase [Thalassiosira pseudonana CCMP1335]	0	37.116	21	8	28	8	1	339	37.8	5.99	178	166	249	6	7	7	metabolic process		catalytic activity		Pf00175	7448933	THAPSDRAFT_25892	THAPSDRAFT_25892	24	Photosynthesis; Metabolic pathways		High	High	High
FALSE	High	Master Protein	ACI64950.1	209586265	predicted protein [Thalassiosira pseudonana CCMP1335]	0	36.483	4	3	20	3	1	998	106.1	4.4	151	159	94	3	3	3						7447091	THAPS_23510	THAPS_23510	7			High	High	High
FALSE	High	Master Protein	EED87598.1	220969257	ascorbate peroxidase [Thalassiosira pseudonana CCMP1335]	0	35.101	29	7	24	7	1	269	29.3	5.4	138	140	230	6	7	6	metabolic process;response to stimulus		antioxidant activity;catalytic activity		Pf00141	7449482	THAPSDRAFT_38724	THAPSDRAFT_38724	22	Glutathione metabolism; Ascorbate and aldarate metabolism		High	High	High
FALSE	High	Master Protein	EED93688.1	220975360	predicted protein [Thalassiosira pseudonana CCMP1335]	0	34.662	14	5	11	5	1	513	57.4	6.65	70	148	117	2	2	4	metabolic process;response to stimulus		antioxidant activity;catalytic activity		Pf00051, Pf00141	7444708	THAPSDRAFT_21683	THAPSDRAFT_21683	3			High	High	High
FALSE	High	Master Protein	EED89559.1	220971224	predicted protein [Thalassiosira pseudonana CCMP1335]	0	34.398	13	5	11	5	1	572	59.4	4.55	208	132	132	4	3	3						7448029	THAPSDRAFT_24564	THAPSDRAFT_24564	12			High	High	High
FALSE	High	Master Protein	EED90235.1	220971902	predicted protein [Thalassiosira pseudonana CCMP1335]	0	33.475	19	2	39	2	1	227	24.1	5.12	565	502	511	2	2	2						7448055	THAPSDRAFT_8028	THAPSDRAFT_8028	9			High	High	High
FALSE	High	Master Protein	EED96420.1	220978094	predicted protein [Thalassiosira pseudonana CCMP1335]	0	32.457	39	4	20	4	1	148	16.2	5.34	195	161	167	4	3	4						7445018	THAPSDRAFT_20812	THAPSDRAFT_20812	1			High	High	High
FALSE	High	Master Protein	EED95633.1	220977307	aspartate aminotransferase [Thalassiosira pseudonana CCMP1335]	0	32.278	23	7	16	7	1	409	44.2	4.86	78	187	136	5	5	6	metabolic process		catalytic activity		Pf00155	7451537	THAPSDRAFT_31394	THAPSDRAFT_31394	1	Biosynthesis of antibiotics; Biosynthesis of amino acids; Metabolic pathways; Biosynthesis of secondary metabolites; Lysine biosynthesis		High	High	High
FALSE	High	Master Protein	EED87340.1	220968997	hypothetical protein THAPSDRAFT_270138 [Thalassiosira pseudonana CCMP1335]	0	32.233	9	3	19	3	1	624	69.1	5.27	144	232	204	1	3	3	metabolic process		catalytic activity		Pf00120, Pf12437	7448923	THAPSDRAFT_270138	GLNN	24	Metabolic pathways; Glyoxylate and dicarboxylate metabolism; Nitrogen metabolism; Biosynthesis of amino acids; Arginine biosynthesis; Alanine, aspartate and glutamate metabolism		High	High	High
FALSE	High	Master Protein	EED94476.1	220976148	predicted protein [Thalassiosira pseudonana CCMP1335]	0	31.395	12	3	8	3	1	339	34.8	4.78	236	86	112	2	1	2	metabolic process	cytoplasm	catalytic activity		Pf00696	7452086	THAPSDRAFT_21978	THAPSDRAFT_21978	3			High	High	High
FALSE	High	Master Protein	EED91615.1	220973284	heat shock protein 70 [Thalassiosira pseudonana CCMP1335]	0	30.885	7	4	9	4	1	653	71.1	4.93	122	70	48	2	3	3	cell organization and biogenesis				Pf00012, Pf06723	7442388	THAPSDRAFT_269120	hsp70	6	Protein processing in endoplasmic reticulum; Endocytosis; Spliceosome		High	High	High
FALSE	High	Master Protein	EED87285.1	220968941	predicted protein [Thalassiosira pseudonana CCMP1335]	0	30.212	3	5	27	5	1	2042	225.7	5.03	249	332	359	4	4	5					Pf13041	7443320	THAPSDRAFT_24352	THAPSDRAFT_24352	11			High	High	High
FALSE	High	Master Protein	EED88915.1	220970578	predicted protein [Thalassiosira pseudonana CCMP1335]	0	28.494	6	5	12	5	1	980	108	4.88	107	45	36	5	3	2			protein binding		Pf12799, Pf13855	7451211	THAPSDRAFT_9764	THAPSDRAFT_9764	14			High	High	High
FALSE	High	Master Protein	EED89356.1	220971020	predicted protein [Thalassiosira pseudonana CCMP1335]	0	25.679	16	6	21	2	1	386	43.1	4.56	56	167	67	4	6	3						7447865	THAPSDRAFT_24708	THAPSDRAFT_24708	13			High	High	High
FALSE	High	Master Protein	EED88152.1	220969813	predicted protein, partial [Thalassiosira pseudonana CCMP1335]	0	25.453	22	4	18	3	1	163	17.1	8.29	104	102	106	3	4	3	metabolic process		catalytic activity		Pf00160	7442162	THAPSDRAFT_37976	THAPSDRAFT_37976	17			High	High	High
FALSE	High	Master Protein	EED88162.1	220969823	predicted protein [Thalassiosira pseudonana CCMP1335]	0	24.939	5	5	10	3	1	934	102.1	4.5	90	132	134	3	4	3					Pf09826	7453110	THAPSDRAFT_25205	THAPSDRAFT_25205	17			High	High	High
FALSE	High	Master Protein	EED90746.1	220972414	peptidyl-prolyl cis-trans isomerase; ppiase [Thalassiosira pseudonana CCMP1335]	0	24.454	27	6	15	5	1	195	20.9	6.93	37	67	85	4	5	4	metabolic process		catalytic activity		Pf00160	7452364	THAPSDRAFT_29244	THAPSDRAFT_29244	8			High	High	High
FALSE	High	Master Protein	EED86309.1	220967944	predicted protein [Thalassiosira pseudonana CCMP1335]	0	24.105	2	2	16	2	1	1222	136.7	5.4	77	96	63	2	2	2			catalytic activity		Pf01501	7447713	THAPSDRAFT_bd1839	THAPSDRAFT_bd1839				High	High	High
FALSE	High	Master Protein	ACI64945.1	209586260	predicted protein [Thalassiosira pseudonana CCMP1335]	0	24.008	16	6	14	4	1	441	46.4	5.05	105	107	128	3	4	5	metabolic process		catalytic activity		Pf00162	7447086	THAPS_270304	THAPS_270304	7	Carbon metabolism; Carbon fixation in photosynthetic organisms; Biosynthesis of secondary metabolites; Metabolic pathways; Biosynthesis of antibiotics; Glycolysis / Gluconeogenesis; Biosynthesis of amino acids		High	High	High
FALSE	High	Master Protein	EED94082.1	220975754	predicted protein [Thalassiosira pseudonana CCMP1335]	0	23.702	5	5	10	5	1	1435	153.2	4.77	117	29	102	5	2	2			protein binding			7452788	THAPSDRAFT_21589	THAPSDRAFT_21589	3			High	High	High
FALSE	High	Master Protein	EED90555.1	220972223	predicted protein [Thalassiosira pseudonana CCMP1335]	0	23.539	8	5	14	5	1	890	96	4.27	96	127	131	3	4	5						7443448	THAPSDRAFT_23668	THAPSDRAFT_23668	8			High	High	High
FALSE	High	Master Protein	EED86206.1	220967833	predicted protein [Thalassiosira pseudonana CCMP1335]	0	22.976	13	4	7	4	1	349	39.4	5.44	99	74	61	3	2	2	metabolic process		catalytic activity		Pf00704	7446045	THAPSDRAFT_bd911	THAPSDRAFT_bd911				High	High	High
FALSE	High	Master Protein	EED91794.1	220973464	predicted protein [Thalassiosira pseudonana CCMP1335]	0	22.803	16	3	12	3	1	273	30.6	4.59	59	121	73	3	3	3			catalytic activity			7447244	THAPSDRAFT_4985	THAPSDRAFT_4985	5			High	High	High
FALSE	High	Master Protein	EED88641.1	220970303	predicted protein [Thalassiosira pseudonana CCMP1335]	0	22.497	5	5	11	5	1	1008	108.7	4.6	114	74	46	4	4	3						7450292	THAPSDRAFT_10256	THAPSDRAFT_10256	15			High	High	High
FALSE	High	Master Protein	EED90268.1	220971935	predicted protein [Thalassiosira pseudonana CCMP1335]	0	22.097	12	3	11	3	1	388	43.5	4.4	173	193	122	3	3	3						7448083	THAPSDRAFT_8086	THAPSDRAFT_8086	9			High	High	High
FALSE	High	Master Protein	EED95846.1	220977520	glyceraldehyde-3-phosphate dehydrogenase precursor, partial [Thalassiosira pseudonana CCMP1335]	0	21.777	12	3	9	3	1	375	39.6	5.36	99	205	225	1	3	2	metabolic process		catalytic activity;nucleotide binding		Pf00044, Pf02800	7445019	THAPSDRAFT_31383	GAPD1	1	Carbon metabolism; Carbon fixation in photosynthetic organisms; Biosynthesis of secondary metabolites; Metabolic pathways; Biosynthesis of antibiotics; Glycolysis / Gluconeogenesis; Biosynthesis of amino acids		High	High	High
FALSE	High	Master Protein	EED88218.1	220969879	predicted protein [Thalassiosira pseudonana CCMP1335]	0	21.695	6	4	8	4	1	664	70.5	4.48	47	65	91	1	4	3			metal ion binding			7444219	THAPSDRAFT_10661	THAPSDRAFT_10661	17			High	High	High
FALSE	High	Master Protein	EED90627.1	220972295	inorganic pyrophosphatase [Thalassiosira pseudonana CCMP1335]	0	21.205	19	4	9	4	1	271	30	4.88	90	111	80	3	3	3	metabolic process	cytoplasm	catalytic activity;metal ion binding	P hydrolase of P-containing anhydrides	Pf00719	7450156	THAPSDRAFT_269348	THAPSDRAFT_269348	8	Oxidative phosphorylation		High	High	High
FALSE	High	Master Protein	EED89359.1	220971023	predicted protein [Thalassiosira pseudonana CCMP1335]	0	21.101	14	3	8	3	1	426	46.7	4.65	105	121	131	2	2	3						7450503	THAPSDRAFT_24710	THAPSDRAFT_24710	13			High	High	High
FALSE	High	Master Protein	EED86258.1	220967888	predicted protein [Thalassiosira pseudonana CCMP1335]	0	20.839	41	4	9	4	1	198	20.5	6.19	52	58	83	1	3	3						7446018	THAPSDRAFT_bd1863	THAPSDRAFT_bd1863				High	High	High
FALSE	High	Master Protein	EED94265.1	220975937	predicted protein [Thalassiosira pseudonana CCMP1335]	0	20.652	5	3	6	3	1	709	75.9	4.54	84	94	49	1	3	1	metabolic process		catalytic activity	P diester;P ester		7451656	THAPSDRAFT_21757	THAPSDRAFT_21757	3			High	High	High
FALSE	High	Master Protein	EED95733.1	220977407	alkaline phosphatase, partial [Thalassiosira pseudonana CCMP1335]	0	20.183	6	5	6	5	1	956	102	4.13	50	35	29	4	1	1	metabolic process		catalytic activity;protein binding		Pf13449	7444164	THAPSDRAFT_260835	THAPSDRAFT_260835	1			High	High	High
FALSE	High	Master Protein	EED92432.1	220974102	Hypothetical protein THAPSDRAFT_262506, partial [Thalassiosira pseudonana CCMP1335]	0	20.104	10	3	7	3	1	449	48.2	4.49	148	149	145	2	2	3					Pf12849	7450043	THAPSDRAFT_262506	THAPSDRAFT_262506	5			High	High	High
FALSE	High	Master Protein	EED95403.1	220977076	predicted protein [Thalassiosira pseudonana CCMP1335]	0	19.59	3	2	5	2	1	926	98.4	4.6	105	83	57	2	1	2						7452282	THAPSDRAFT_21414	THAPSDRAFT_21414	2			High	High	High
FALSE	High	Master Protein	EED93808.1	220975480	predicted protein [Thalassiosira pseudonana CCMP1335]	0	19.447	8	4	12	4	1	613	67.8	5.85	86	75	90	3	3	4					Pf00188	7451692	THAPSDRAFT_21795	THAPSDRAFT_21795	3			High	High	High
FALSE	High	Master Protein	ACI64274.1	209583588	glycine or serine hydroxymethyltransferase, serine methylase [Thalassiosira pseudonana CCMP1335]	0	18.223	10	4	6	4	1	531	58.1	7.03	46	63	46	1	2	3	metabolic process		catalytic activity		Pf00155, Pf00464	7442966	THAPS_269942	THAPS_269942	18	Biosynthesis of secondary metabolites; Biosynthesis of amino acids; Cyanoamino acid metabolism; Carbon metabolism; Glyoxylate and dicarboxylate metabolism; Metabolic pathways; Biosynthesis of antibiotics; Glycine, serine and threonine metabolism; One carbon pool by folate		High	High	High
FALSE	High	Master Protein	EED90806.1	220972474	predicted protein [Thalassiosira pseudonana CCMP1335]	0	17.604	26	4	10	4	1	176	19.5	5.64	67	75	71	4	2	3						7452424	THAPSDRAFT_23684	THAPSDRAFT_23684	8			High	High	High
FALSE	High	Master Protein	EED90735.1	220972403	trypsin-like serine protease, partial [Thalassiosira pseudonana CCMP1335]	0	16.416	11	2	4	2	1	238	25.9	4.87	67	90	49	2	1	1	metabolic process		catalytic activity		Pf00089	7444934	THAPSDRAFT_263452	THAPSDRAFT_263452	8			High	High	High
FALSE	High	Master Protein	EED93403.1	220975074	alpha enolase [Thalassiosira pseudonana CCMP1335]	0	16.386	9	4	10	3	1	440	46.5	4.91	40	78	71	2	4	4	metabolic process		catalytic activity;metal ion binding		Pf00113, Pf03952	7446146	THAPSDRAFT_40391	ENO1	4	RNA degradation; Glycolysis / Gluconeogenesis; Biosynthesis of antibiotics; Biosynthesis of amino acids; Carbon metabolism; Biosynthesis of secondary metabolites; Metabolic pathways		High	High	High
FALSE	High	Master Protein	P04264.5	1346343	KERATIN, TYPE II CYTOSKELETAL 1 (CYTOKERATIN 1) (K1) (CK 1) (67 KD CYTOKERATIN) (HAIR ALPHA PROTEIN) gi|186772 (M98776) keratin 1 [Homo sapiens]	0	16.221	8	4	6	4	1	644	66	8.12	73		112	3		1	cell death;defense response;metabolic process;regulation of biological process;response to stimulus;transport	cytoskeleton;cytosol;extracellular;membrane;nucleus	catalytic activity;motor activity;protein binding;receptor activity;structural molecule activity;transporter activity	P hydrolase of P-containing anhydrides	Pf00038, Pf01496, Pf01576, Pf05103, Pf05957, Pf12128, Pf13166, Pf13514	3848		KRT1	12		Corticotropin-releasing hormone signaling pathway	High	Not Found	High
FALSE	High	Master Protein	EED95209.1	220976882	predicted protein [Thalassiosira pseudonana CCMP1335]	0	16.064	3	3	3	3	1	1183	126.1	4.54		157	24		2	1						7446513	THAPSDRAFT_268234	THAPSDRAFT_268234	2			High	High	Not Found
FALSE	High	Master Protein	EED88103.1	220969763	fucoxanthin chlorophyll a/c protein 2, partial [Thalassiosira pseudonana CCMP1335]	0	15.984	12	2	4	2	1	198	21.1	4.68	76	72	82	1	1	2	metabolic process	membrane			Pf00504	7443378	THAPSDRAFT_260392	Lhcf2	20			High	High	High
FALSE	High	Master Protein	EED92629.1	220974299	hypothetical protein THAPSDRAFT_268966, partial [Thalassiosira pseudonana CCMP1335]	0	15.968	10	4	7	4	1	421	46.4	4.44	37	99	29	2	3	2	metabolic process		catalytic activity		Pf00704	7442291	THAPSDRAFT_268966	THAPSDRAFT_268966	5	Amino sugar and nucleotide sugar metabolism; Metabolic pathways		High	High	High
FALSE	High	Master Protein	EED88770.1	220970433	hypothetical protein THAPSDRAFT_264181, partial [Thalassiosira pseudonana CCMP1335]	0	15.576	30	2	5	2	1	123	13.8	5.45	40	72	90	1	2	2	metabolic process		catalytic activity;protein binding		Pf08332, Pf12680, Pf13474, Pf13577, Pf14534	7451249	THAPSDRAFT_264181	THAPSDRAFT_264181	14			High	High	High
FALSE	High	Master Protein	EED91613.1	220973282	predicted protein [Thalassiosira pseudonana CCMP1335]	0	15.474	10	3	7	3	1	393	43	5.59	50	67	88	2	3	2	metabolic process		catalytic activity;metal ion binding		Pf01116	7442386	THAPSDRAFT_270288	THAPSDRAFT_270288	6	Biosynthesis of secondary metabolites; Pentose phosphate pathway; Biosynthesis of antibiotics; Fructose and mannose metabolism; Biosynthesis of amino acids; Metabolic pathways; Carbon metabolism; Glycolysis / Gluconeogenesis; Carbon fixation in photosynthetic organisms		High	High	High
FALSE	High	Master Protein	EED91225.1	220972894	HSP90 family member [Thalassiosira pseudonana CCMP1335]	0	15.429	8	5	9	5	1	706	80.2	4.79	64	71	68	3	2	4	metabolic process;response to stimulus		nucleotide binding;protein binding		Pf00183, Pf02518, Pf13589	7442389	THAPSDRAFT_6285	HSP90_1	6	Protein processing in endoplasmic reticulum		High	High	High
FALSE	High	Master Protein	EED94897.1	220976570	transaldolase [Thalassiosira pseudonana CCMP1335]	0	15.104	11	2	3	2	1	317	34.8	4.89		129	52		2	1	metabolic process	cytoplasm	catalytic activity		Pf00923	7452450	THAPSDRAFT_27187	TAL1_1	2	Carbon metabolism; Pentose phosphate pathway; Biosynthesis of secondary metabolites; Metabolic pathways; Biosynthesis of antibiotics; Biosynthesis of amino acids		High	High	Not Found
FALSE	High	Master Protein	EED90419.1	220972086	thioredoxin [Thalassiosira pseudonana CCMP1335]	0	14.701	20	2	7	2	1	105	11.4	4.97	26	60	35	1	2	2	cellular homeostasis;metabolic process;regulation of biological process		catalytic activity		Pf00085, Pf11009, Pf13098, Pf13899, Pf13905, Pf14595	7443527	THAPSDRAFT_41697	THAPSDRAFT_41697	9			High	High	High
FALSE	High	Master Protein	EED93743.1	220975415	mitochondrial manganese superoxide dismutase, partial [Thalassiosira pseudonana CCMP1335]	0	14.626	14	3	8	3	1	243	27	5.62	124	128	102	3	3	2	metabolic process		antioxidant activity;catalytic activity;metal ion binding		Pf00081, Pf02777	7444762	THAPSDRAFT_32874	THAPSDRAFT_32874	3	Peroxisome		High	High	High
FALSE	High	Master Protein	EED92063.1	220973733	enolase [Thalassiosira pseudonana CCMP1335]	0	14.57	10	3	5	2	1	436	46.7	4.98	40	60	80	1	2	2	metabolic process		catalytic activity;metal ion binding		Pf00113, Pf03952	7453217	THAPSDRAFT_40771	ENO2	5	Carbon metabolism; Biosynthesis of secondary metabolites; Metabolic pathways; RNA degradation; Glycolysis / Gluconeogenesis; Biosynthesis of antibiotics; Biosynthesis of amino acids		High	High	Not Found
FALSE	High	Master Protein	EED91332.1	220973001	oxygen-evolving enhancer protein 1 precursor [Thalassiosira pseudonana CCMP1335]	0	14.459	13	4	6	4	1	305	32.1	5.31	20	43	116	1	1	4	metabolic process;regulation of biological process		metal ion binding		Pf01716	7444594	THAPSDRAFT_270210	PsbO	6	Photosynthesis; Metabolic pathways		High	High	High
FALSE	High	Master Protein	EED93389.1	220975060	predicted protein [Thalassiosira pseudonana CCMP1335]	0	14.275	7	2	6	2	1	365	39.4	9.1	79	44	70	2	2	2						7446132	THAPSDRAFT_22325	THAPSDRAFT_22325	4			High	High	High
FALSE	High	Master Protein	EED95871.1	220977545	ornithine cyclodeaminase, partial [Thalassiosira pseudonana CCMP1335]	0	14.167	20	4	7	4	1	357	37.3	5.44	27	44	60	1	1	4					Pf02423	7451513	THAPSDRAFT_260953	THAPSDRAFT_260953	1			High	High	High
FALSE	High	Master Protein	EED91827.1	220973497	predicted protein [Thalassiosira pseudonana CCMP1335]	0	13.826	11	4	11	4	1	464	51	5.96	35	78	103	3	3	4						7448477	THAPSDRAFT_22560	THAPSDRAFT_22560	5			High	High	High
FALSE	High	Master Protein	EED94319.1	220975991	probable S-adenosylmethionine synthetase [Thalassiosira pseudonana CCMP1335]	0	13.155	6	2	4	2	1	465	50.3	5.36	46	29	65	2	1	1	metabolic process		catalytic activity;nucleotide binding		Pf00438, Pf02772, Pf02773	7441903	THAPSDRAFT_21815	AMS1	3	Biosynthesis of amino acids; Cysteine and methionine metabolism; Metabolic pathways; Biosynthesis of secondary metabolites		High	High	High
FALSE	High	Master Protein	EED86318.1	220967955	predicted protein [Thalassiosira pseudonana CCMP1335]	0	12.461	12	2	4	2	1	230	25.4	8.41	94	88		2	2						Pf00188	7447674	THAPSDRAFT_bd1822	THAPSDRAFT_bd1822				Not Found	High	High
FALSE	High	Master Protein	EED92617.1	220974287	hypothetical protein THAPSDRAFT_268958 [Thalassiosira pseudonana CCMP1335]	0	12.459	11	3	8	3	1	423	46.6	5.15	25	35	49	1	2	3						7442279	THAPSDRAFT_268958	THAPSDRAFT_268958	5			High	High	High
FALSE	High	Master Protein	EED91224.1	220972893	predicted protein [Thalassiosira pseudonana CCMP1335]	0	12.295	8	2	4	2	1	365	38.4	4.17	55	56	80	1	1	2						7445997	THAPSDRAFT_6284	THAPSDRAFT_6284	6			High	High	High
FALSE	High	Master Protein	EED92232.1	220973902	predicted protein, partial [Thalassiosira pseudonana CCMP1335]	0	12.221	4	3	5	3	1	941	101.2	5.88	58		56	3		2			metal ion binding;nucleotide binding		Pf00122, Pf00689, Pf00690, Pf00702, Pf12710, Pf13246	7448438; 7447233	THAPSDRAFT_34487; THAPSDRAFT_34541	THAPSDRAFT_34487; THAPSDRAFT_34541	5			High	Not Found	High
FALSE	High	Master Protein	EED89008.1	220970671	predicted protein [Thalassiosira pseudonana CCMP1335]	0	12.209	14	3	6	3	1	216	23.9	4.96	65	79	73	2	2	2	cellular homeostasis;regulation of biological process				Pf00085, Pf13098, Pf13899, Pf13905	7451589	THAPSDRAFT_24932	THAPSDRAFT_24932	14			High	High	High
FALSE	High	Master Protein	EED91466.1	220973135	ascorbate peroxidase, partial [Thalassiosira pseudonana CCMP1335]	0	12.184	8	2	3	2	1	297	32.2	4.93		67	48		2	1	metabolic process;response to stimulus		antioxidant activity;catalytic activity		Pf00141	7451158	THAPSDRAFT_262753	ApxS	6	Glutathione metabolism; Ascorbate and aldarate metabolism		High	High	Not Found
FALSE	High	Master Protein	EED86340.1	220967977	predicted protein [Thalassiosira pseudonana CCMP1335]	0	12.182	7	3	6	3	1	429	47.4	9.01	42	70	20	2	3	1					Pf00188	7447696	THAPSDRAFT_bd779	THAPSDRAFT_bd779				High	High	High
FALSE	High	Master Protein	EED92569.1	220974239	predicted protein [Thalassiosira pseudonana CCMP1335]	0	12.085	4	3	4	3	1	780	82.6	4.56	24		70	2		1	metabolic process	extracellular			Pf01607	7448197	THAPSDRAFT_22855	THAPSDRAFT_22855	5			High	Not Found	High
FALSE	High	Master Protein	EED86160.1	220967784	cytochrome c550, PsbV [Thalassiosira pseudonana CCMP1335]	0	11.752	23	2	5	2	1	163	17.8	7.3	53	78	38	1	2	2	metabolic process	membrane	metal ion binding		Pf00034, Pf13442, Pf14495	7447380	THAPSDRAFT_bd1039	PsbV		Photosynthesis; Metabolic pathways		High	High	High
FALSE	High	Master Protein	EED88271.1	220969932	predicted protein [Thalassiosira pseudonana CCMP1335]	0	11.726	4	4	8	2	1	927	101.1	4.48	45	64	46	3	3	2					Pf09826	7450332	THAPSDRAFT_10552	THAPSDRAFT_10552	17			High	High	High
FALSE	High	Master Protein	EED88602.1	220970264	predicted protein [Thalassiosira pseudonana CCMP1335]	0	11.523	8	4	6	4	1	567	63.7	7.02	28	33	65	2	1	3	metabolic process		catalytic activity		Pf00501	7443938	THAPSDRAFT_25022	THAPSDRAFT_25022	15			High	High	High
FALSE	High	Master Protein	EED87497.1	220969155	n-acetylornithine aminotransferase [Thalassiosira pseudonana CCMP1335]	0	11.425	8	3	5	3	1	479	50.7	5.86	43	55	42	2	1	2	metabolic process		catalytic activity		Pf00202	7442690	THAPSDRAFT_270136	THAPSDRAFT_270136	23			High	High	High
FALSE	High	Master Protein	EED87568.1	220969226	predicted protein, partial [Thalassiosira pseudonana CCMP1335]	0	10.69	20	2	4	2	1	157	16.6	4.6	48	68	79	1	2	1	metabolic process		catalytic activity		Pf01081	7442695	THAPSDRAFT_38807	THAPSDRAFT_38807	23			High	High	High
FALSE	High	Master Protein	EED90545.1	220972213	mitochondrial ATPase, inner membrane [Thalassiosira pseudonana CCMP1335]	0	10.662	9	3	6	3	1	542	58	5.97	33	61	81	1	2	3	metabolic process;transport		catalytic activity;nucleotide binding;transporter activity	P hydrolase of P-containing anhydrides	Pf00006, Pf00306, Pf02874, Pf09378	7452400	THAPSDRAFT_269322	atpA	8	Oxidative phosphorylation; Metabolic pathways		High	High	High
FALSE	High	Master Protein	EED92638.1	220974308	hypothetical protein THAPSDRAFT_262659, partial [Thalassiosira pseudonana CCMP1335]	0	10.299	7	2	6	2	1	270	28.9	4.36	42	56	34	2	2	1	metabolic process		catalytic activity		Pf00089	7444920	THAPSDRAFT_262659	THAPSDRAFT_262659	5			High	High	High
FALSE	High	Master Protein	ACI64800.1	209586115	acetyl-coa carboxylase [Thalassiosira pseudonana CCMP1335]	0	10.286	1	2	5	2	1	2088	228.2	5.16	58	41	39	2	2	1	metabolic process		catalytic activity;metal ion binding;nucleotide binding		Pf00289, Pf00364, Pf01039, Pf02785, Pf02786, Pf08326, Pf13535	7446216	THAPS_6770	ACC	7	Propanoate metabolism; Pyruvate metabolism; Fatty acid metabolism; Fatty acid biosynthesis; Metabolic pathways; Biosynthesis of secondary metabolites		High	High	High
FALSE	High	Master Protein	EED95299.1	220976972	predicted protein [Thalassiosira pseudonana CCMP1335]	0	9.869	11	3	7	3	1	331	35.2	4.06	46	25	45	1	1	3					Pf09459	7444663	THAPSDRAFT_21306	THAPSDRAFT_21306	2			High	High	High
FALSE	High	Master Protein	EED88699.1	220970362	eukaryotic translation initiation factor 4A [Thalassiosira pseudonana CCMP1335]	0	9.622	6	2	5	2	1	369	42.4	5.69	70	43	52	1	1	2			nucleotide binding		Pf00270, Pf00271	7451640	THAPSDRAFT_9716	THAPSDRAFT_9716	14	RNA transport		High	High	High
FALSE	High	Master Protein	EED94749.1	220976422	n-acetyl-gamma-glutamyl-phosphate reductase, urea cycle [Thalassiosira pseudonana CCMP1335]	0	9.437	12	3	4	3	1	357	38.5	5.17		58	68		2	2	metabolic process;regulation of biological process	cytoplasm	catalytic activity;enzyme regulator activity;nucleotide binding		Pf00543, Pf01118	7450360	THAPSDRAFT_21290	AGPR	2	Arginine biosynthesis; Metabolic pathways; Biosynthesis of secondary metabolites; 2-Oxocarboxylic acid metabolism; Biosynthesis of antibiotics; Biosynthesis of amino acids		High	High	Not Found
FALSE	High	Master Protein	EED89506.1	220971171	predicted protein [Thalassiosira pseudonana CCMP1335]	0	9.339	9	2	7	2	1	248	26.8	5.38	25	69	38	1	2	2						7445847	THAPSDRAFT_24512	THAPSDRAFT_24512	12			High	High	High
FALSE	High	Master Protein	EED92601.1	220974271	predicted protein [Thalassiosira pseudonana CCMP1335]	0	9.159	8	2	8	2	1	324	34.2	4.48	95	68	89	2	2	2	metabolic process		catalytic activity		Pf00089	7444879	THAPSDRAFT_40831	THAPSDRAFT_40831	5			High	High	High
FALSE	High	Master Protein	EED86434.1	220968078	hypothetical protein THAPSDRAFT_bd1766 [Thalassiosira pseudonana CCMP1335]	0	9.089	5	2	10	2	1	410	45.5	5	73	77	56	2	2	2					Pf11356	7447294	THAPSDRAFT_bd1766	THAPSDRAFT_bd1766				High	High	High
FALSE	High	Master Protein	S41161	1082558	keratin 9, cytoskeletal - human gi|435476 (Z29074) cytokeratin 9 [Homo sapiens]	0	8.952	4	3	3	3	1	623	62.1	5.3	33	51		2	1		cell death;cell organization and biogenesis	cytosol;membrane;nucleus	structural molecule activity		Pf00038, Pf13166	3857		KRT9	17			Not Found	High	High
FALSE	High	Master Protein	ACI64949.1	209586264	predicted protein [Thalassiosira pseudonana CCMP1335]	0	8.937	4	2	3	2	1	645	69.1	4.58	31	27		1	2							7447090	THAPS_23509	THAPS_23509	7			Not Found	High	High
FALSE	High	Master Protein	EED94499.1	220976171	predicted protein [Thalassiosira pseudonana CCMP1335]	0	8.778	4	3	3	3	1	1172	126.3	4.4	46		51	2		1					Pf00066	7452114	THAPSDRAFT_22002	THAPSDRAFT_22002	3			High	Not Found	High
FALSE	High	Master Protein	EED87531.1	220969189	predicted protein [Thalassiosira pseudonana CCMP1335]	0	8.531	13	3	6	3	1	237	25.3	5.44	22	35	66	1	2	3					Pf10563	7448875	THAPSDRAFT_25840	THAPSDRAFT_25840	23			High	High	High
FALSE	High	Master Protein	EED92744.1	220974415	ABC cassette-containing protein, partial [Thalassiosira pseudonana CCMP1335]	0	8.474	3	2	2	2	1	935	103.8	6.48		44			2				catalytic activity;nucleotide binding	P hydrolase of P-containing anhydrides	Pf00005, Pf13304, Pf13558	7452596	THAPSDRAFT_262083	THAPSDRAFT_262083	4			Not Found	High	Not Found
FALSE	High	Master Protein	EED90433.1	220972100	predicted protein [Thalassiosira pseudonana CCMP1335]	0	8.438	8	2	3	2	1	266	28.2	5.57		62	35		2	1	metabolic process	cytoplasm	catalytic activity;metal ion binding		Pf00883	7443544	THAPSDRAFT_29314	THAPSDRAFT_29314	9	Glutathione metabolism; Metabolic pathways		High	High	Not Found
FALSE	High	Master Protein	EED95212.1	220976885	predicted protein [Thalassiosira pseudonana CCMP1335]	0	7.958	9	2	3	2	1	273	29.3	8.82		40	75		1	2						7446515	THAPSDRAFT_2343	THAPSDRAFT_2343	2			High	High	Not Found
FALSE	High	Master Protein	EED93672.1	220975344	enoyl-reductase [NADH] [Thalassiosira pseudonana CCMP1335]	0	7.928	10	2	2	2	1	312	32.8	5.11		30			2		metabolic process		catalytic activity		Pf13561	7444050	THAPSDRAFT_32860	EAR1	3	Metabolic pathways; Biotin metabolism; Fatty acid biosynthesis; Fatty acid metabolism		Not Found	High	Not Found
FALSE	High	Master Protein	EED92067.1	220973737	ypt1-like rab-type small G protein [Thalassiosira pseudonana CCMP1335]	0	7.716	14	2	5	2	1	201	22.5	6.57	24	37	40	1	2	2	regulation of biological process;response to stimulus		catalytic activity;nucleotide binding	P hydrolase of P-containing anhydrides	Pf00025, Pf00071, Pf01926, Pf04670, Pf08477, Pf13191	7448137	THAPSDRAFT_22792	THAPSDRAFT_22792	5			High	High	High
FALSE	High	Master Protein	EED87416.1	220969073	predicted protein [Thalassiosira pseudonana CCMP1335]	0	7.486	11	2	3	2	1	214	24.1	4.84		28	34		2	1						7452031	THAPSDRAFT_12205	THAPSDRAFT_12205	24			High	High	Not Found
FALSE	High	Master Protein	EED86678.1	220968330	glucose-6-phosphate isomerase [Thalassiosira pseudonana CCMP1335]	0	7.389	4	2	4	2	1	555	61.6	6.25		43	50		1	2	metabolic process		catalytic activity		Pf00342	7446308	THAPSDRAFT_38266	GPI1	19			High	High	Not Found
FALSE	High	Master Protein	EED88356.1	220970017	predicted protein, partial [Thalassiosira pseudonana CCMP1335]	0	6.957	33	2	5	2	1	66	7.3	7.8	62	21	49	2	1	2					Pf09360	7453077	THAPSDRAFT_20194	THAPSDRAFT_20194	17			High	High	High
FALSE	High	Master Protein	EED94416.1	220976088	predicted protein [Thalassiosira pseudonana CCMP1335]	0	6.796	6	3	5	3	1	556	59.1	5.17	38		39	3		2						7449553	THAPSDRAFT_21916	THAPSDRAFT_21916	3			High	Not Found	High
FALSE	High	Master Protein	EED90825.1	220972493	hypothetical protein THAPSDRAFT_35934 [Thalassiosira pseudonana CCMP1335]	0	6.75	16	2	4	2	1	133	13.5	4.93	59	71	52	2	1	1			metal ion binding		Pf00034, Pf13442, Pf14495	7445547	THAPSDRAFT_35934	THAPSDRAFT_35934	8	Photosynthesis		High	High	High
FALSE	High	Master Protein	EED87697.1	220969356	actin-like protein [Thalassiosira pseudonana CCMP1335]	0	6.528	7	2	4	2	1	377	41.8	5.08	45		61	2		2					Pf00022	7449411	THAPSDRAFT_25772	ACT1	22	Phagosome		High	Not Found	High
FALSE	High	Master Protein	EED92838.1	220974509	hypothetical protein THAPSDRAFT_262153, partial [Thalassiosira pseudonana CCMP1335]	0	6.371	6	2	5	2	1	340	38.2	4.46	26	33	27	2	1	1	metabolic process		catalytic activity		Pf00704	7447934	THAPSDRAFT_262153	THAPSDRAFT_262153	4			High	High	High
FALSE	High	Master Protein	JC4313	1363944	type I keratin 16 - human gi|1195531|bbs|172338 (S79867) type I keratin 16, K16 [human, epidermal keratinocytes, Peptide, 473 aa] [Homo sapiens]	0	5.93	4	2	2	2	1	473	51.2	5.05			57			2	cell death;cell differentiation;cell organization and biogenesis;cell proliferation;cellular component movement;defense response;regulation of biological process;response to stimulus	cytoskeleton;cytosol;nucleus	protein binding;structural molecule activity		Pf00038, Pf07888, Pf13514	3868		KRT16	17			High	Not Found	Not Found
FALSE	High	Master Protein	EED92389.1	220974059	predicted protein [Thalassiosira pseudonana CCMP1335]	0	5.633	6	2	2	2	1	414	44.2	4.81			48			2	metabolic process	cytoplasm	catalytic activity;metal ion binding;nucleotide binding		Pf00180	7449595	THAPSDRAFT_268875	THAPSDRAFT_268875	5			High	Not Found	Not Found
FALSE	High	Master Protein	EED93339.1	220975010	hypothetical protein THAPSDRAFT_27892 [Thalassiosira pseudonana CCMP1335]	0	5.618	6	2	2	2	1	455	49.5	6.79		30	46		1	1			catalytic activity		Pf00202	7447965	THAPSDRAFT_27892	THAPSDRAFT_27892	4	Arginine and proline metabolism; Metabolic pathways; Biosynthesis of secondary metabolites; Biosynthesis of antibiotics		High	High	Not Found
FALSE	High	Master Protein	EED96387.1	220978061	hypothetical protein THAPSDRAFT_1326 [Thalassiosira pseudonana CCMP1335]	0	5	6	2	4	2	1	409	45.3	5.26	31	47	66	1	1	2	metabolic process		catalytic activity		Pf01747, Pf14306	7445300	THAPSDRAFT_1326	THAPSDRAFT_1326	1	Selenocompound metabolism; Purine metabolism; Monobactam biosynthesis; Metabolic pathways; Sulfur metabolism; Biosynthesis of antibiotics		High	High	High
FALSE	High	Master Protein	EED86186.1	220967810	ATP synthase alpha chain, thylakoid ATPase, plastid protein [Thalassiosira pseudonana CCMP1335]	0	4.713	5	2	2	2	1	503	54	5.02			26			2	metabolic process;transport		catalytic activity;nucleotide binding;transporter activity	P hydrolase of P-containing anhydrides	Pf00006, Pf00306, Pf02874, Pf09378	7447406	THAPSDRAFT_bd1287	atpA		Metabolic pathways; Photosynthesis; Oxidative phosphorylation		High	Not Found	Not Found
FALSE	High	Master Protein	ACI64947.1	209586262	predicted protein, partial [Thalassiosira pseudonana CCMP1335]	0	4.367	11	2	2	2	1	173	19.3	9.89	24			2							Pf00188	7447088	THAPS_263212	THAPS_263212	7			Not Found	Not Found	High
